# Supplementary material
Source: PubMed Central journal article supplement (PMC9107935)
Supplement: NIHMS1800547-supplement-Supple_figs_tables.pdf [file NIHMS1800547-supplement-Supple_figs_tables.pdf]

## Supplementary Materials

### Supplementary Tables:

**Table E1.** Comparison of Treatment-Specific Factors According to Treatment Modality.

**Table E2.** Comparison of Patient Characteristics within the Development and Validation Cohorts

**Table E3.** Univariable Association of the Patient Characteristics with Overall Survival in the Development Set.

**Table E4.** Determinants for Patients Receiving DRT in the Primary, Low-risk, and High-risk Cohorts.

### Supplementary Figures:

**Fig. E1.** Balance between treatment groups evaluated by standardized mean difference (SMD) before and after inverse probability of treatment weighting (IPTW) adjustment. A SMD less than 0.1 indicates excellent balance.

**Fig. E2.** The pair-wise correlations among 11 variables used in multivariate analysis.

**Fig. E3.** The VIF plot and Eigenvalues plot of 11 variables used in multivariate analysis.

**Fig. E4.** The stratified model-based trees classified patients into different treatment effects subgroups based on the prognostic score derived from nomogram (Figure 3A) by controlling the max depth of the tree. Here, a max depth of three was found to be ideal. Patients with a prognostic score  $\leq 102$  exhibited more survival benefit when comparing the two treatment modalities.

**Fig. E5.** General dominance of independent predictors for receiving definitive radiotherapy in low-risk cohort.

**Table E1.** Comparison of Treatment-Specific Factors According to Treatment Modality.

| Characteristic                   | Total<br>(N=460) | PCT plus DRT<br>(N=244) | PCT alone<br>(N=216) | P value |
|----------------------------------|------------------|-------------------------|----------------------|---------|
| First-line PCT regimen           |                  |                         |                      | <0.001  |
| FP                               | 167 (36.3)       | 74 (30.3)               | 93 (43.1)            |         |
| TP                               | 114 (24.8)       | 62 (25.4)               | 52 (24.1)            |         |
| GP                               | 36 (7.8)         | 13 (5.3)                | 23 (10.6)            |         |
| TPF                              | 143 (31.1)       | 95 (38.9)               | 48 (22.2)            |         |
| Cycle of first-line PCT          |                  |                         |                      | 0.124   |
| <6                               | 167 (36.3)       | 97 (39.8)               | 70 (32.4)            |         |
| ≥6                               | 293 (63.7)       | 147 (60.2)              | 146 (67.6)           |         |
| RT technique                     |                  |                         |                      | -       |
| CRT                              | 39 (8.5)         | 39 (16.0)               | -                    |         |
| IMRT                             | 205 (44.6)       | 205 (84.0)              | -                    |         |
| RT dose (continuous)             |                  |                         |                      | -       |
| Mean (Gy)                        | 69.1             | 69.1                    | -                    |         |
| Median (Gy)                      | 70               | 70                      | -                    |         |
| Range (Gy)                       | 44-74            | 44-74                   | -                    |         |
| Interquartile Range              | 68-70            | 68-70                   | -                    |         |
| RT dose (group)                  |                  |                         |                      | -       |
| <60Gy                            | 2 (0.4)          | 2 (0.8)                 | -                    |         |
| 60-69.9Gy                        | 71 (15.4)        | 71 (29.1)               | -                    |         |
| ≥70Gy                            | 171 (37.2)       | 171 (70.1)              | -                    |         |
| Concurrent chemotherapy          |                  |                         |                      | -       |
| No                               | 122 (26.5)       | 122 (50.0)              | -                    |         |
| Cisplatin                        | 90 (19.6)        | 90 (36.9)               | -                    |         |
| Other platinum drugs             | 15 (3.3)         | 15 (6.1)                | -                    |         |
| Non-platinum drugs               | 17 (3.7)         | 17 (7.0)                | -                    |         |
| Cycle of concurrent chemotherapy |                  |                         |                      | -       |
| 0                                | 122 (26.5)       | 122 (50.0)              | -                    |         |
| 1                                | 15 (3.3)         | 15 (6.1)                | -                    |         |
| 2                                | 82 (17.8)        | 82 (33.6)               | -                    |         |
| 3                                | 15 (3.3)         | 15 (6.1)                | -                    |         |
| ≥4                               | 10 (2.2)         | 10 (4.1)                | -                    |         |
| Other concurrent treatment       |                  |                         |                      | -       |
| No                               | 229 (49.8)       | 229 (93.9)              | -                    |         |
| Nimotuzumab                      | 8 (1.7)          | 8 (3.3)                 | -                    |         |
| Cetuximab                        | 5 (1.1)          | 5 (2.0)                 | -                    |         |
| Bevacizumab                      | 1 (0.2)          | 1 (0.4)                 | -                    |         |
| CIK therapy                      | 1 (0.2)          | 1 (0.4)                 | -                    |         |
| Local treatment                  |                  |                         |                      | <0.001  |
| No                               | 376 (81.7)       | 173 (70.9)              | 203 (94.0)           |         |
| Local RT                         | 62 (13.5)        | 56 (23.0)               | 6 (2.8)              |         |
| Local ablation                   | 15 (3.3)         | 11 (4.5)                | 4 (1.9)              |         |
| Surgery                          | 3 (0.7)          | 2 (0.8)                 | 1 (0.5)              |         |
| Ablation plus local RT           | 2 (0.4)          | 2 (0.8)                 | 0 (0)                |         |
| Ablation plus surgery            | 2 (0.4)          | 0 (0)                   | 2 (0.9)              |         |
| Salvage treatment                |                  |                         |                      | 0.001   |
| No                               | 285 (62.0)       | 171 (70.1)              | 114 (52.8)           |         |
| Second-line                      | 84 (18.3)        | 34 (13.9)               | 50 (23.1)            |         |
| Third-line                       | 41 (8.9)         | 14 (5.7)                | 27 (12.5)            |         |
| More than third-line             | 50 (10.9)        | 25 (10.2)               | 25 (11.6)            |         |

Abbreviation: PCT, palliative chemotherapy; DRT, definitive radiotherapy; FP, 5-fluorouracil and platinum; TP, taxane and platinum; GP, gemcitabine and platinum; TPF, taxane, platinum and 5-fluorouracil; CRT, conventional radiotherapy; IMRT, intensity-modulated radiotherapy; CIK, cytokines induced killer.

| <b>Table E2.</b> Comparison of Patient Characteristics within Training and Validation Cohorts. |                          |                                     |                                      |          |
|------------------------------------------------------------------------------------------------|--------------------------|-------------------------------------|--------------------------------------|----------|
| <b>Variable</b>                                                                                | <b>Total<br/>(N=460)</b> | <b>Training Cohort<br/>(N= 296)</b> | <b>Validation Cohort<br/>(N=164)</b> | <b>P</b> |
| Age (year)                                                                                     |                          |                                     |                                      | 0.662    |
| <45                                                                                            | 204 (44.3)               | 134 (45.3)                          | 70 (42.7)                            |          |
| ≥45                                                                                            | 256 (55.7)               | 162 (54.7)                          | 94 (57.3)                            |          |
| Sex                                                                                            |                          |                                     |                                      | 1.000    |
| Female                                                                                         | 69 (15.0)                | 44 (14.9)                           | 25 (15.2)                            |          |
| Male                                                                                           | 391 (85.0)               | 252 (85.1)                          | 139 (84.8)                           |          |
| Residence                                                                                      |                          |                                     |                                      | 0.014    |
| Rural                                                                                          | 199 (43.3)               | 115 (38.9)                          | 84 (51.2)                            |          |
| Urban                                                                                          | 261 (56.7)               | 181 (61.1)                          | 80 (48.8)                            |          |
| Employment                                                                                     |                          |                                     |                                      | 0.181    |
| Unemployed                                                                                     | 87 (18.9)                | 59 (19.9)                           | 28 (17.1)                            |          |
| Employed                                                                                       | 329 (71.5)               | 204 (68.9)                          | 125 (76.2)                           |          |
| Retired                                                                                        | 44 (9.57)                | 33 (11.1)                           | 11 (6.71)                            |          |
| Marital status                                                                                 |                          |                                     |                                      | 0.762    |
| Unmarried                                                                                      | 12 (2.61)                | 7 (2.36)                            | 5 (3.05)                             |          |
| Married                                                                                        | 448 (97.4)               | 289 (97.6)                          | 159 (97.0)                           |          |
| Education                                                                                      |                          |                                     |                                      | 0.095    |
| Low                                                                                            | 74 (16.1)                | 45 (15.2)                           | 29 (17.7)                            |          |
| Medium                                                                                         | 248 (53.9)               | 152 (51.4)                          | 96 (58.5)                            |          |
| High                                                                                           | 138 (30.0)               | 99 (33.4)                           | 39 (23.8)                            |          |
| Insurance status                                                                               |                          |                                     |                                      | <0.001   |
| Uninsured                                                                                      | 244 (53.0)               | 136 (45.9)                          | 108 (65.9)                           |          |
| Insured                                                                                        | 216 (47.0)               | 160 (54.1)                          | 56 (34.1)                            |          |
| KPS                                                                                            |                          |                                     |                                      | <0.001   |
| ≥80                                                                                            | 141 (30.7)               | 122 (41.2)                          | 19 (11.6)                            |          |
| <80                                                                                            | 319 (69.3)               | 174 (58.8)                          | 145 (88.4)                           |          |
| Comorbidity                                                                                    |                          |                                     |                                      | 0.566    |
| No                                                                                             | 322 (70.0)               | 204 (68.9)                          | 118 (72.0)                           |          |
| Yes                                                                                            | 138 (30.0)               | 92 (31.1)                           | 46 (28.0)                            |          |
| Smoking                                                                                        |                          |                                     |                                      | 0.538    |
| No                                                                                             | 276 (60.0)               | 174 (58.8)                          | 102 (62.2)                           |          |
| Yes                                                                                            | 184 (40.0)               | 122 (41.2)                          | 62 (37.8)                            |          |
| Drinking                                                                                       |                          |                                     |                                      | 0.721    |
| No                                                                                             | 414 (90.0)               | 268 (90.5)                          | 146 (89.0)                           |          |
| Yes                                                                                            | 46 (10.0)                | 28 (9.46)                           | 18 (11.0)                            |          |
| BMI (kg/m2)                                                                                    |                          |                                     |                                      | 0.606    |
| <18.5                                                                                          | 104 (22.6)               | 67 (22.6)                           | 37 (22.6)                            |          |
| 18.5-24                                                                                        | 258 (56.1)               | 170 (57.4)                          | 88 (53.7)                            |          |
| >24                                                                                            | 98 (21.3)                | 59 (19.9)                           | 39 (23.8)                            |          |
| Histology                                                                                      |                          |                                     |                                      | 0.645    |
| II                                                                                             | 18 (3.91)                | 13 (4.39)                           | 5 (3.05)                             |          |
| III                                                                                            | 442 (96.1)               | 283 (95.6)                          | 159 (97.0)                           |          |
| Tumor category                                                                                 |                          |                                     |                                      | 0.105    |
| T1                                                                                             | 26 (5.65)                | 15 (5.07)                           | 11 (6.71)                            |          |
| T2                                                                                             | 58 (12.6)                | 44 (14.9)                           | 14 (8.54)                            |          |
| T3                                                                                             | 231 (50.2)               | 152 (51.4)                          | 79 (48.2)                            |          |
| T4                                                                                             | 145 (31.5)               | 85 (28.7)                           | 60 (36.6)                            |          |
| Node category                                                                                  |                          |                                     |                                      | 0.005    |
| N0                                                                                             | 13 (2.83)                | 9 (3.04)                            | 4 (2.44)                             |          |
| N1                                                                                             | 74 (16.1)                | 53 (17.9)                           | 21 (12.8)                            |          |
| N2                                                                                             | 191 (41.5)               | 135 (45.6)                          | 56 (34.1)                            |          |
| N3                                                                                             | 182 (39.6)               | 99 (33.4)                           | 83 (50.6)                            |          |
| Liver metastases                                                                               |                          |                                     |                                      | 0.403    |
| No                                                                                             | 307 (66.7)               | 193 (65.2)                          | 114 (69.5)                           |          |
| Yes                                                                                            | 153 (33.3)               | 103 (34.8)                          | 50 (30.5)                            |          |
| Bone metastases                                                                                |                          |                                     |                                      | 0.799    |
| No                                                                                             | 155 (33.7)               | 98 (33.1)                           | 57 (34.8)                            |          |
| Yes                                                                                            | 305 (66.3)               | 198 (66.9)                          | 107 (65.2)                           |          |

|                           |            |            |            |        |
|---------------------------|------------|------------|------------|--------|
| Lung metastases           |            |            |            | 0.655  |
| No                        | 327 (71.1) | 213 (72.0) | 114 (69.5) |        |
| Yes                       | 133 (28.9) | 83 (28.0)  | 50 (30.5)  |        |
| No. of metastatic sites   |            |            |            | 0.180  |
| Single                    | 303 (65.9) | 202 (68.2) | 101 (61.6) |        |
| Multiple                  | 157 (34.1) | 94 (31.8)  | 63 (38.4)  |        |
| No. of metastatic lesions |            |            |            | 0.827  |
| Single                    | 97 (21.1)  | 61 (20.6)  | 36 (22.0)  |        |
| Multiple                  | 363 (78.9) | 235 (79.4) | 128 (78.0) |        |
| ALP (U/L)                 |            |            |            | 0.116  |
| <110                      | 341 (74.1) | 227 (76.7) | 114 (69.5) |        |
| ≥110                      | 119 (25.9) | 69 (23.3)  | 50 (30.5)  |        |
| CRP (g/mL)                |            |            |            | 0.019  |
| <3                        | 255 (55.4) | 158 (53.4) | 97 (59.1)  |        |
| ≥3                        | 194 (42.2) | 127 (42.9) | 67 (40.9)  |        |
| Missing                   | 11 (2.39)  | 11 (3.72)  | 0 (0.00)   |        |
| LDH (U/L)                 |            |            |            | 0.734  |
| <245                      | 295 (64.1) | 192 (64.9) | 103 (62.8) |        |
| ≥245                      | 165 (35.9) | 104 (35.1) | 61 (37.2)  |        |
| Pretreatment EBV DNA      |            |            |            | <0.001 |
| Undetectable              | 67 (14.6)  | 44 (14.9)  | 23 (14.0)  |        |
| Detectable                | 356 (77.4) | 217 (73.3) | 139 (84.8) |        |
| Missing                   | 37 (8.04)  | 35 (11.8)  | 2 (1.22)   |        |
| First-line PCT y regimen  |            |            |            | 0.012  |
| PF                        | 167 (36.3) | 92 (31.1)  | 75 (45.7)  |        |
| GP                        | 36 (7.83)  | 23 (7.77)  | 13 (7.93)  |        |
| TP                        | 114 (24.8) | 83 (28.0)  | 31 (18.9)  |        |
| TPF                       | 143 (31.1) | 98 (33.1)  | 45 (27.4)  |        |
| Cycle of first-line PCT   |            |            |            | 0.104  |
| <6                        | 167 (36.3) | 116 (39.2) | 51 (31.1)  |        |
| ≥6                        | 293 (63.7) | 180 (60.8) | 113 (68.9) |        |
| DRT                       |            |            |            | 0.379  |
| No                        | 216 (47.0) | 144 (48.2) | 72 (43.9)  |        |
| Yes                       | 244 (53.0) | 152 (51.8) | 92 (56.1)  |        |
| Local treatment           |            |            |            | 0.307  |
| No                        | 380 (82.6) | 249 (84.1) | 131 (79.9) |        |
| Yes                       | 80 (17.4)  | 47 (15.9)  | 33 (20.1)  |        |
| Salvage treatment         |            |            |            | 1.000  |
| No                        | 285 (62.0) | 183 (61.8) | 102 (62.2) |        |
| Yes                       | 175 (38.0) | 113 (38.2) | 62 (37.8)  |        |
| Posttreatment EBV DNA     |            |            |            | <0.001 |
| Undetectable              | 240 (52.2) | 150 (50.7) | 90 (54.9)  |        |
| Detectable                | 143 (31.1) | 81 (27.4)  | 62 (37.8)  |        |
| Missing                   | 77 (16.7)  | 65 (22.0)  | 12 (7.32)  |        |
| Response of primary tumor |            |            |            | 0.014  |
| CR                        | 57 (12.4)  | 26 (8.78)  | 31 (18.9)  |        |
| PR                        | 376 (81.7) | 253 (85.5) | 123 (75.0) |        |
| SD                        | 18 (3.91)  | 12 (4.05)  | 6 (3.66)   |        |
| PD                        | 9 (1.96)   | 5 (1.69)   | 4 (2.44)   |        |
| Response of metastasis    |            |            |            | 0.296  |
| CR                        | 46 (10.0)  | 27 (9.12)  | 19 (11.6)  |        |
| PR                        | 250 (54.3) | 170 (57.4) | 80 (48.8)  |        |
| SD                        | 106 (23.0) | 66 (22.3)  | 40 (24.4)  |        |
| PD                        | 58 (12.6)  | 33 (11.1)  | 25 (15.2)  |        |

Abbreviation: KPS, Karnofsky Performance Score; BMI, body mass index; ALP, alkaline phosphatase; LDH, lactate dehydrogenase; CRP, C-reactive protein; EBV DNA, Epstein–Barr virus DNA; FP, 5-fluorouracil and platinum; TP, taxane and platinum; GP, gemcitabine and platinum; TPF, taxane, platinum and 5-fluorouracil; PCT, palliative chemotherapy; DRT, definitive radiotherapy; CR, complete response; PR, partial response; SD, stable disease; PD, progression disease.

**Table E3.** Univariable Association of the Patient Characteristics with Overall Survival in the Training Cohorts.

| Variable                                  | HR     | 95% CI       | P         |
|-------------------------------------------|--------|--------------|-----------|
| Age (year): $\geq 45$ v $< 45$            | 1.231  | 0.923-1.642  | 0.158     |
| Sex: male v female                        | 1.275  | 0.849-1.917  | 0.242     |
| Residence: urban v rural                  | 0.808  | 0.605-1.079  | 0.149     |
| Employment                                |        |              |           |
| employed v unemployed                     | 0.772  | 0.549-1.085  | 0.136     |
| retired v unemployed                      | 0.757  | 0.451-1.272  | 0.293     |
| Marital status: married v unmarried       | 2.999  | 0.744-12.086 | 0.122     |
| Education                                 |        |              |           |
| medium v low                              | 1.193  | 0.791-1.800  | 0.400     |
| high v low                                | 0.925  | 0.592-1.445  | 0.732     |
| Insurance: insured v uninsured            | 0.839  | 0.632-1.114  | 0.225     |
| Kamofsky score: $\geq 80$ v $< 80$        | 1.352  | 1.017-1.796  | 0.038     |
| Comorbidity: yes v no                     | 1.053  | 0.777-1.427  | 0.740     |
| Smoking: yes v no                         | 1.209  | 0.909-1.608  | 0.192     |
| Drinking: yes v no                        | 0.911  | 0.560-1.482  | 0.708     |
| BMI (kg/m <sup>2</sup> )                  |        |              |           |
| 18.5-24 v $< 18.5$                        | 1.320  | 0.925-1.884  | 0.127     |
| $> 24$ v $< 18.5$                         | 0.902  | 0.572-1.421  | 0.656     |
| Histology: III v II                       | 1.943  | 0.799-4.725  | 0.143     |
| T stage:                                  |        |              |           |
| T3 v T1-2                                 | 0.975  | 0.669-1.421  | 0.895     |
| T4 v T1-2                                 | 1.106  | 0.736-1.664  | 0.627     |
| N stage                                   |        |              |           |
| N2 v N0-1                                 | 1.056  | 0.719-1.553  | 0.780     |
| N3 v N0-1                                 | 1.577  | 1.056-2.354  | 0.026     |
| Live metastasis: yes v no                 | 2.623  | 1.963-3.506  | $< 0.001$ |
| Bone metastasis: yes v no                 | 0.920  | 0.682-1.241  | 0.585     |
| Lung metastasis: yes v no                 | 0.966  | 0.702-1.328  | 0.831     |
| No. of metastatic sites:                  |        |              |           |
| multiple v single                         | 2.552  | 1.902-3.421  | $< 0.001$ |
| No. of metastatic lesions:                |        |              |           |
| multiple v single                         | 1.921  | 1.312-2.810  | $< 0.001$ |
| ALP (U/L): $\geq 110$ v $< 110$           | 1.597  | 1.158-2.202  | 0.004     |
| CRP (g/mL): $\geq 3$ v $< 3$              | 1.619  | 1.202-2.181  | 0.002     |
| LDH (U/L): $\geq 245$ v $< 245$           | 2.144  | 1.602-2.869  | $< 0.001$ |
| Pretreatment EBV DNA:                     |        |              |           |
| detectable v undetectable                 | 1.412  | 0.929-2.147  | 0.106     |
| First-line PCT regimen:                   |        |              |           |
| GP v FP                                   | 1.570  | 0.916-2.690  | 0.101     |
| TP v FP                                   | 0.893  | 0.615-1.297  | 0.553     |
| TPF v FP                                  | 0.821  | 0.578-1.166  | 0.271     |
| Cycle of first-line PCT: $\geq 6$ v $< 6$ | 1.065  | 0.794-1.429  | 0.675     |
| Posttreatment EBV DNA:                    |        |              |           |
| detectable v undetectable                 | 4.235  | 3.024-5.929  | $< 0.001$ |
| Response of primary tumor:                |        |              |           |
| PR v CR                                   | 1.002  | 0.615-1.631  | 0.995     |
| SD/PD v CR                                | 1.927  | 0.943-3.936  | 0.072     |
| Response of metastasis:                   |        |              |           |
| PR v CR                                   | 2.142  | 1.083-4.234  | 0.029     |
| SD v CR                                   | 3.497  | 1.717-7.121  | 0.001     |
| PD v CR                                   | 11.644 | 5.461-24.826 | $< 0.001$ |

Abbreviation: BMI, body mass index; ALP, alkaline phosphatase; LDH, lactate dehydrogenase; CRP, C-reactive protein; EBV DNA, Epstein-Barr virus DNA; FP, 5-fluorouracil and platinum; TP, taxane and platinum; GP, gemcitabine and platinum; TPF, taxane, platinum and 5-fluorouracil; CR, complete response; PR, partial response; SD, stable disease; PD, progression disease.

**Table E4.** Determinants for Patients Receiving DRT in the Primary, Low-risk, and High-risk Cohorts.

| Predictors                             | HR (95% CI)         | P value |
|----------------------------------------|---------------------|---------|
| <b>Primary Cohort</b>                  |                     |         |
| Insurance status, yes                  | 2.700 (1.738-4.233) | <0.001  |
| Education                              |                     |         |
| Low                                    | Reference           |         |
| Medium                                 | 1.767 (0.962-3.301) | 0.069   |
| High                                   | 2.816 (1.429-5.649) | 0.003   |
| Karnofsky Performance Score, $\geq 80$ | 1.928 (1.192-3.141) | 0.008   |
| Liver metastasis, yes                  | 0.414 (0.250-0.679) | 0.021   |
| Number of metastatic sites, multiple   | 0.551 (0.329-0.920) | 0.023   |
| Number of metastatic lesions, multiple | 0.536 (0.291-0.967) | 0.041   |
| Pre-treatment EBV DNA                  | 0.519 (0.278-0.949) | 0.036   |
| Response of metastasis                 |                     |         |
| CR                                     | Reference           |         |
| PR                                     | 0.376 (0.157-0.839) | 0.021   |
| SD                                     | 0.328 (0.129-0.779) | 0.014   |
| PD                                     | 0.109 (0.037-0.296) | <0.001  |
| <b>Low-risk Cohort</b>                 |                     |         |
| Insurance status, yes                  | 3.094 (1.854-5.236) | <0.001  |
| Education                              |                     |         |
| Low                                    | Reference           |         |
| Medium                                 | 1.890 (0.905-4.001) | 0.092   |
| High                                   | 3.008 (1.429-5.649) | 0.008   |
| T category                             |                     |         |
| T1-2                                   | Reference           |         |
| T3                                     | 1.511 (0.755-3.027) | 0.242   |
| T4                                     | 2.341 (1.109-4.993) | 0.026   |
| Liver metastasis, yes                  | 0.235 (0.120-0.446) | <0.001  |
| Response of metastasis                 |                     |         |
| CR                                     | Reference           |         |
| PR                                     | 0.349 (0.142-0.792) | 0.016   |
| SD                                     | 0.234 (0.084-0.609) | 0.004   |
| PD                                     | 0.025 (0.001-0.207) | 0.003   |
| <b>High-risk Cohort</b>                |                     |         |
| Alkaline phosphatase, $\geq 110$       | 0.240 (0.072-0.675) | 0.011   |

Abbreviation: DRT, definitive radiotherapy; HR, hazard ratio; CI, confidence interval; LDH, lactate dehydrogenase; EBV DNA, Epstein–Barr virus DNA; CR, complete response; PR, partial response; SD, stable disease; PD, disease progression.

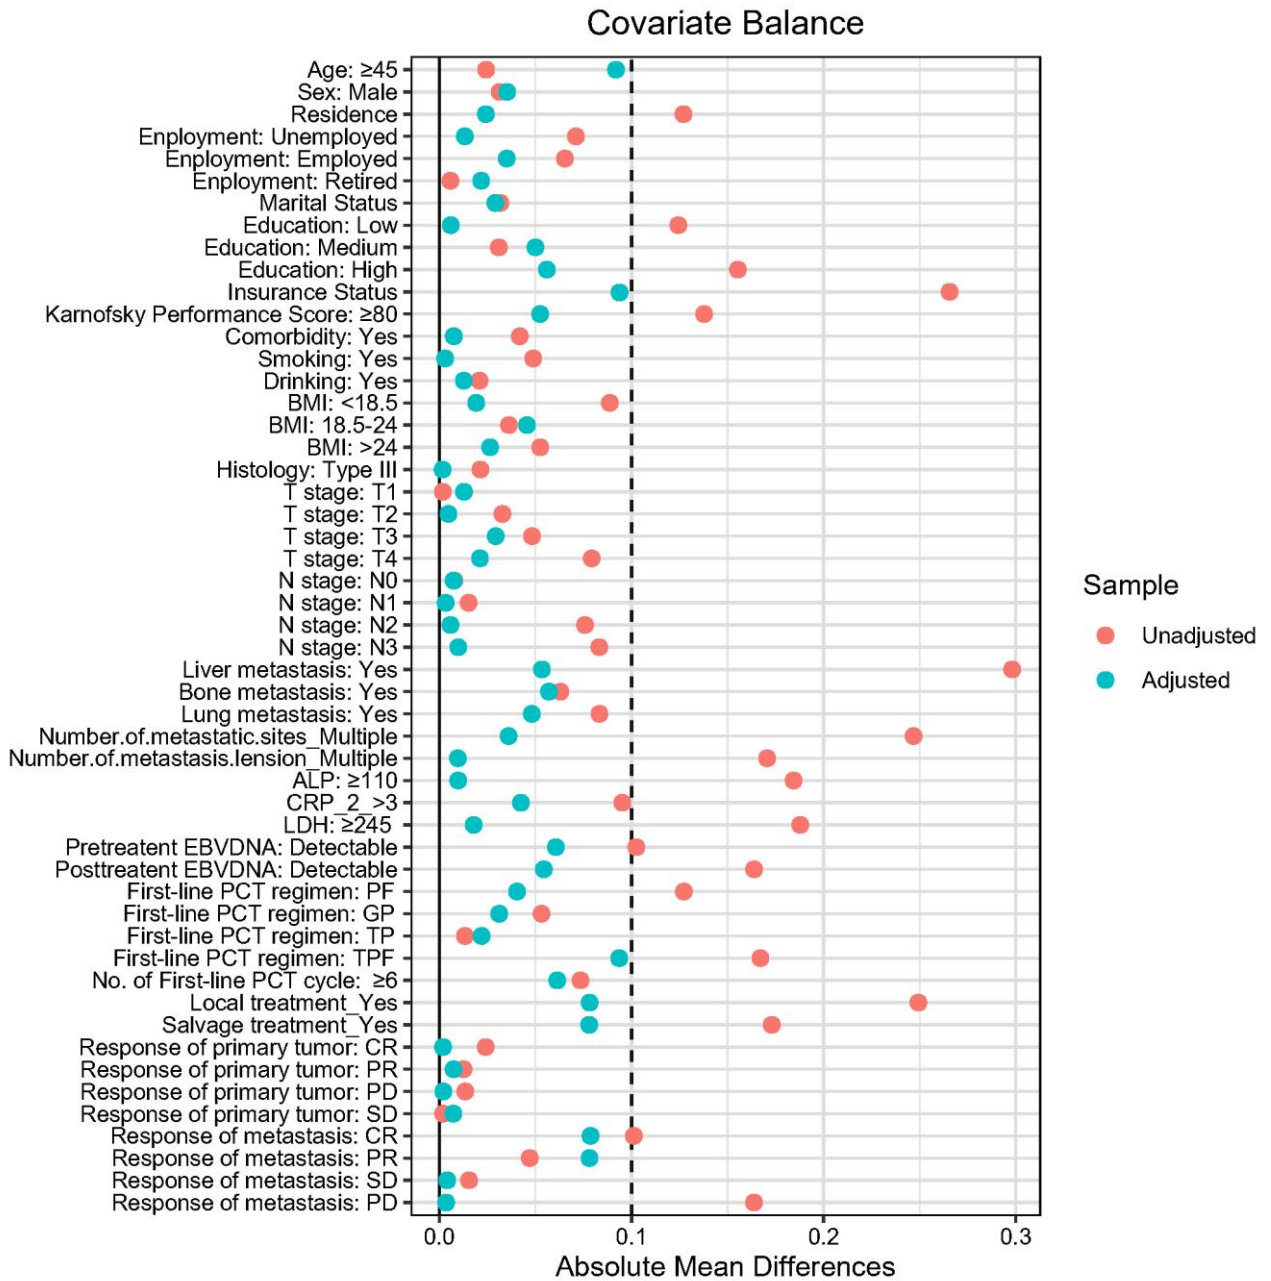

**Fig. E1.** Balance between treatment groups evaluated by standardized mean difference (SMD) before and after inverse probability of treatment weighting (IPTW) adjustment. A SMD less than 0.1 indicates excellent balance.

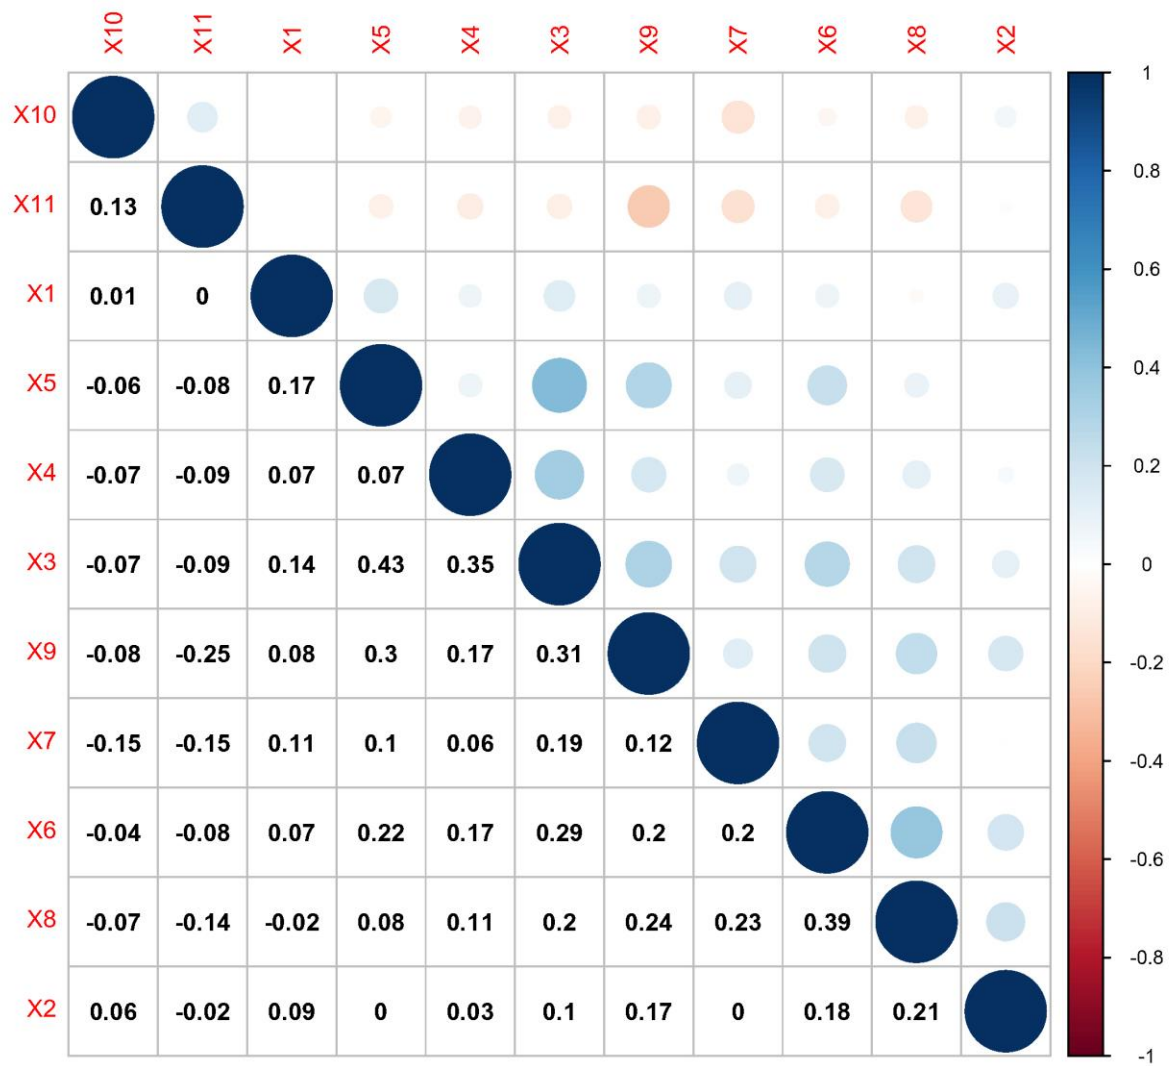

**X1:** KPS   **X2:** N category   **X3:** Number of metastatic sites  
**X4:** Number of metastasis lension   **X5:** Liver metastasis  
**X6:** LDH   **X7:** ALP   **X8:** CRP   **X9:** Posttreatment EBV DNA  
**X10:** Response of primary tumor   **X11:** Response of metastasis

**Fig. E2.** The pair-wise correlations among 11 variables used in multivariate analysis.



### VIF Plot

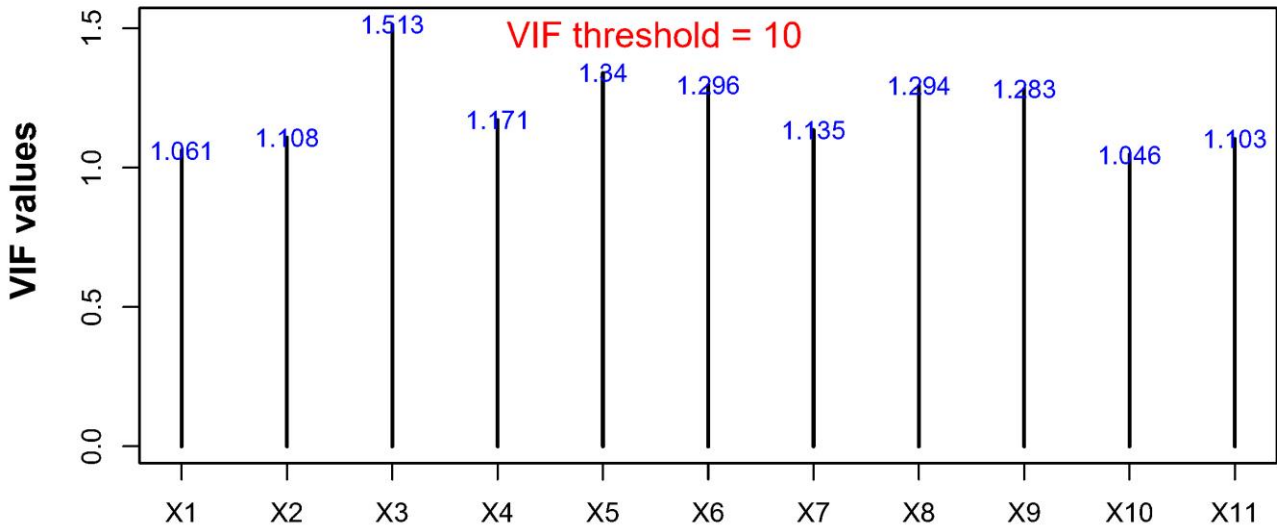

### Eigenvalues Plot

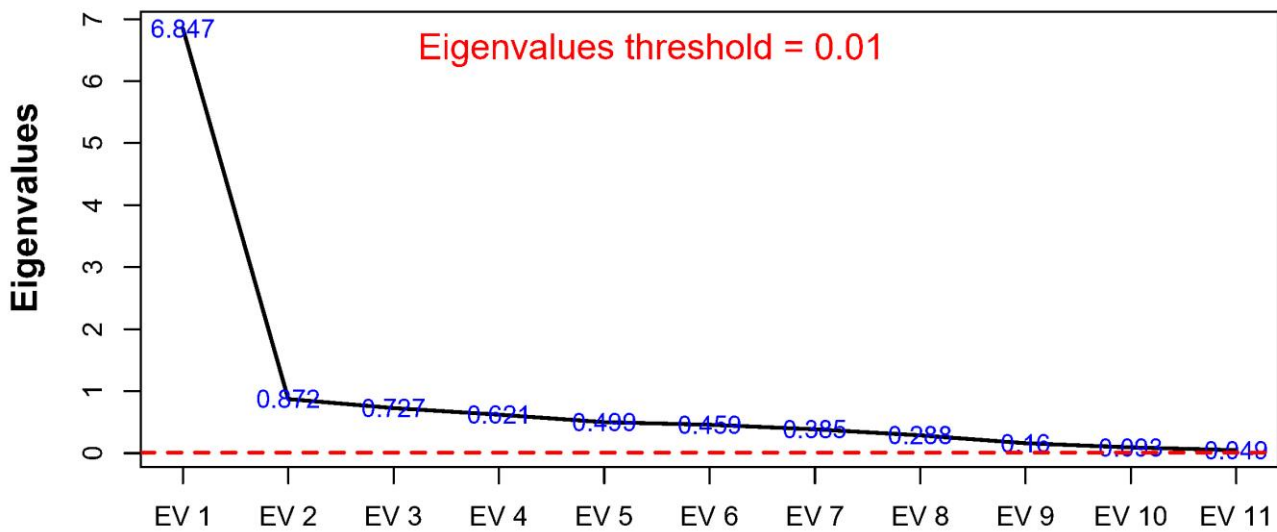

**X1:** KPS **X2:** N category **X3:** Number of metastatic site  
**X4:** Number of metastasis lension **X5:** Liver metastasis  
**X6:** LDH **X7:** ALP **X8:** CRP **X9:** Posttreatment EBV DNA  
**X10:** Response of primary tumor **X11:** Response of metastasis

**Fig. E3.** The VIF plot and Eigenvalues plot of 11 variables used in multivariate analysis

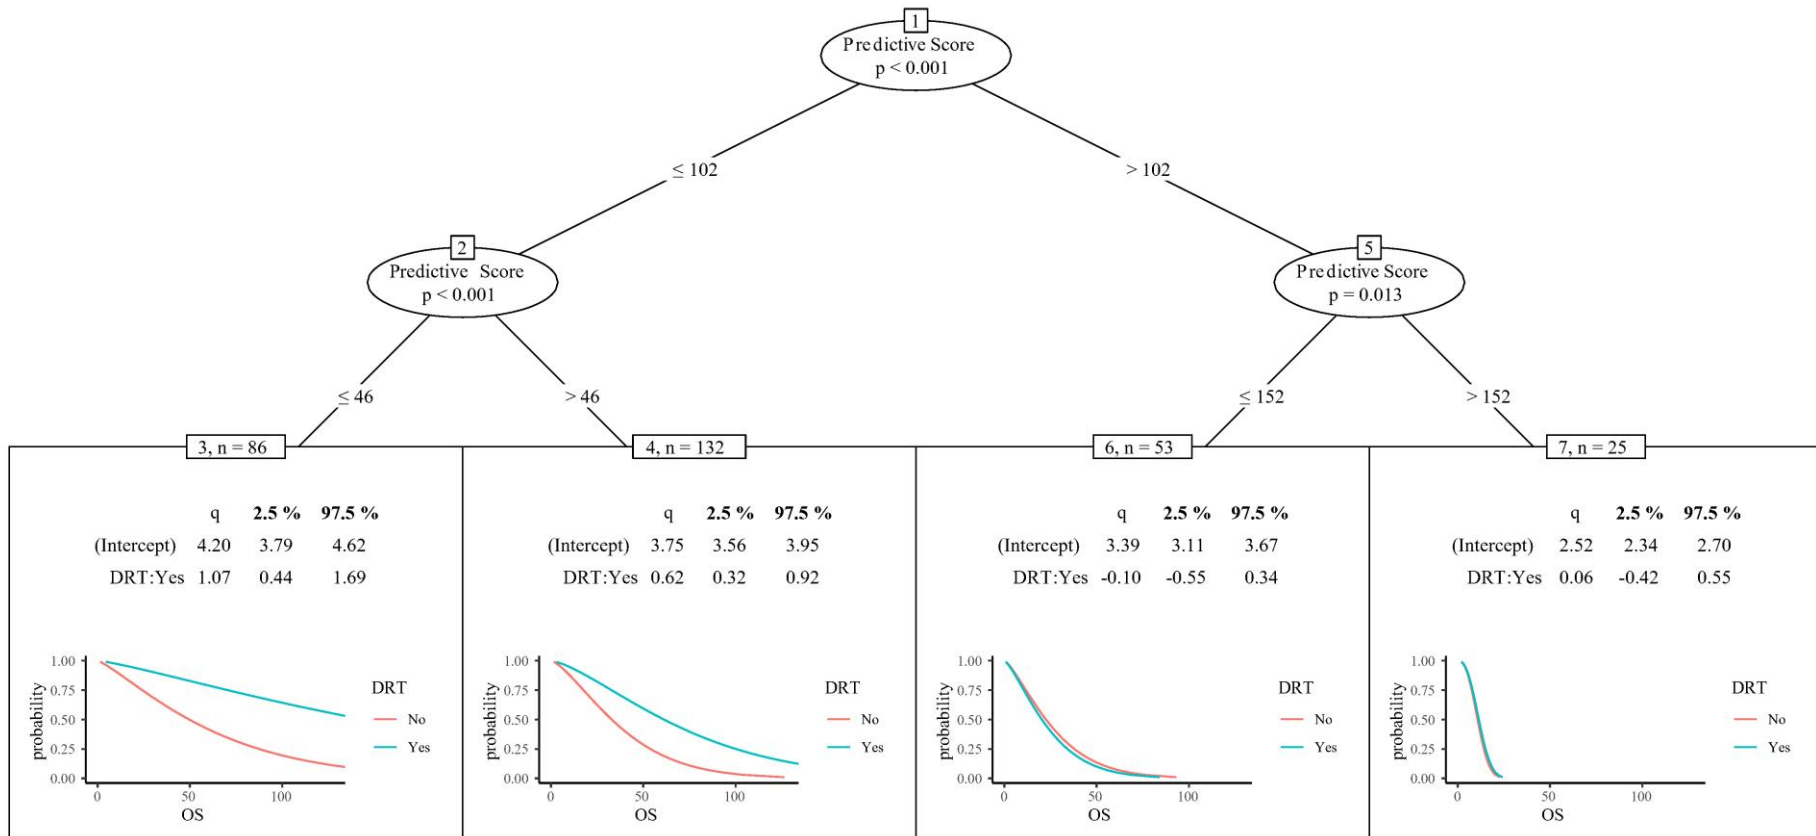

**Fig. E4.** The stratified model-based trees classified patients into different treatment effects subgroups based on the prognostic score derived from nomogram (Figure 3A) by controlling the max depth of the tree. Here, a max depth of three was found to be ideal. Patients with a prognostic score  $\leq 102$  exhibited more survival benefit when comparing the two treatment modalities.

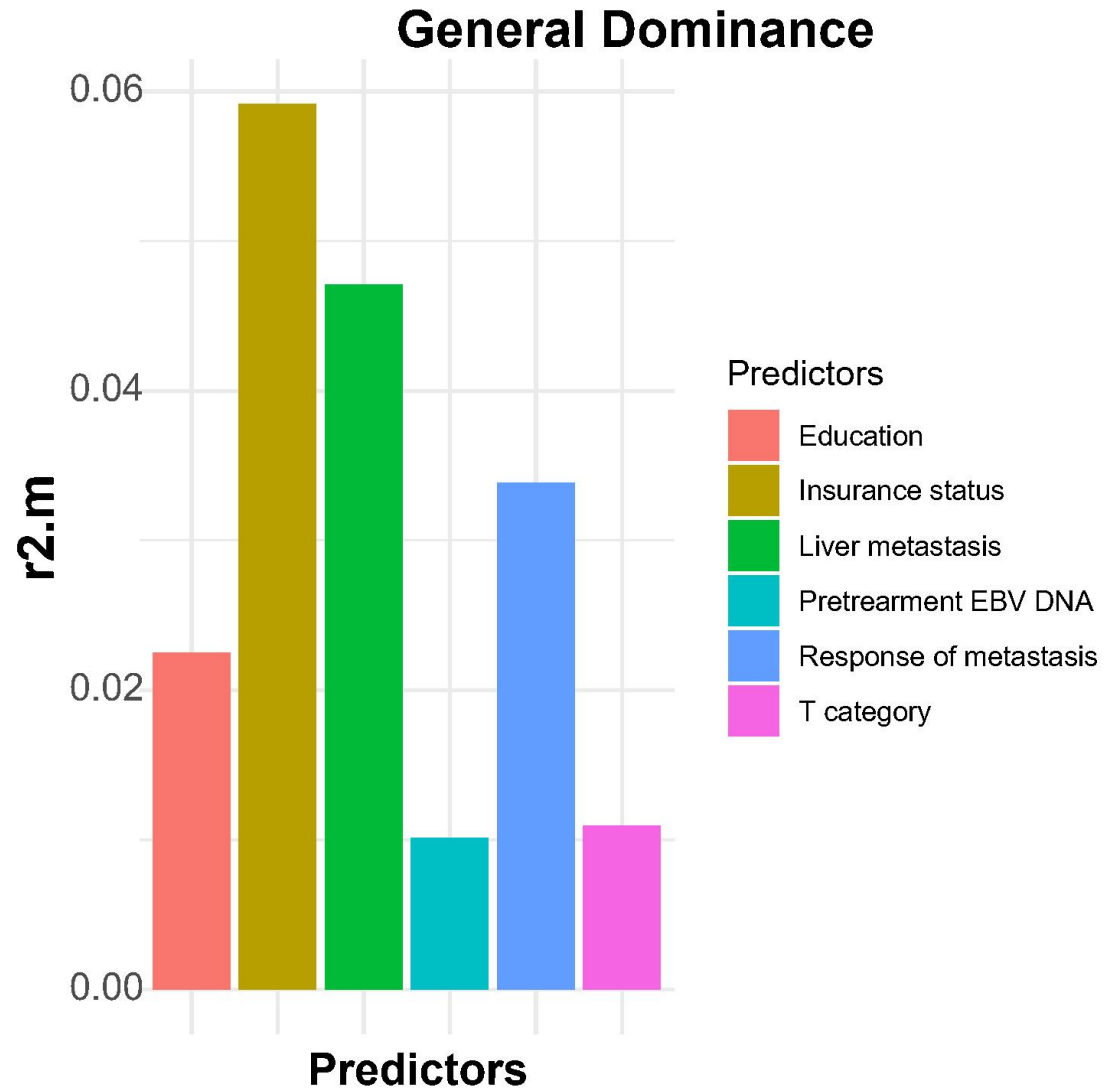

**Fig. E5.** General dominance of independent predictors for receiving definitive radiotherapy in low-risk cohort.
